# Supplementary material for: Erythropoietin N-glycosylation of Therapeutic Formulations Quantified and Characterized: An Interlab Comparability Study of High-Throughput Methods
Source: MDPI journal article supplement (doi:10.3390/biom14010125), 2024-01-18
Supplement: s1 [file s1]

## **Supplementary Material**

### **Table of Contents**

**Table S1:** Precision of glycosylation profiling (all analytes).

**Table S2:** Differences in median CVs (Analytes above 1% relative abundance).

**Figure S1:** Profile comparability PharmEPO.

**Figure S2:** Profile comparability Eprex.

**Table S3:** Fingerprinting resolution.

**Table S4:** Eprex relative glycan abundances by composition.

The effect of reducing the number of analytes to only those above 1% relative abundance is apparent when comparing Table 1 to Table S1. As expected, all methods show a lower median CV for the abundant analytes than for all analytes.

**Table S1.** Precision of glycosylation profiling. Descriptive statistics for the distribution of CVs of all analytes.

|               | Aranesp |         |          | PharmEPO |         |          | Eprex    |         |           |
|---------------|---------|---------|----------|----------|---------|----------|----------|---------|-----------|
|               | HA      | HP      | MS       | HA       | HP      | MS       | HA       | HP      | MS        |
| # of analytes | 28      | 43      | 68       | 30       | 41      | 76       | 28       | 42      | 76        |
| Median CV     | 3.4     | 2.0     | 6.3      | 3.0      | 1.8     | 7.2      | 2.1      | 2.3     | 13.8      |
| (95% CI)      | 2.3-4.6 | 1.4-2.5 | 5.2-7.4  | 2.4-4.5  | 1.3-2.6 | 6.2-8.7  | 1.5-3.6  | 1.9-2.9 | 11.3-16.2 |
| IQR           | 2.3-4.7 | 1.1-3.1 | 3.5-10.0 | 2.0-4.7  | 1.2-3.4 | 4.9-12.2 | 1.4-3.9  | 1.5-3.6 | 7.5-21.5  |
| Min-Max       | 1.0-5.3 | 0.5-7.4 | 1.3-26.1 | 0.6-11.2 | 0.4-7.6 | 1.9-59.8 | 0.5-10.5 | 0.3-5.7 | 1.8-44.2  |
| # < 5% CV     | 24      | 40      | 22       | 24       | 37      | 20       | 25       | 39      | 5         |

HA = HILIC-FLD(2AB); HP = HILIC-FLD(PROC); MS = MALDI-MS. IQR= interquartile range.

**Table S2.** Differences in median CVs (Analytes above 1% relative abundance).

| p-values                              | Aranesp           | PharmEPO          | Eprex             |
|---------------------------------------|-------------------|-------------------|-------------------|
| HILIC-FLD(2AB) versus HILIC-FLD(PROC) | <b>0.0061</b>     | 0.1353            | 0.4855            |
| HILIC-FLD(2AB) versus MALDI-MS        | 0.2154            | <b>0.0021</b>     | <b>&lt;0.0001</b> |
| HILIC-FLD(PROC) versus MALDI-MS       | <b>&lt;0.0001</b> | <b>&lt;0.0001</b> | <b>&lt;0.0001</b> |

Discoveries highlighted in bold green.

Differences in median CVs. were tested with a Kruskal-Wallis test with multiple comparisons. Multiple testing correction was applied using a 5% FDR and the Benjamini-Hochberg method. Only analytes above 1% relative abundance were considered.

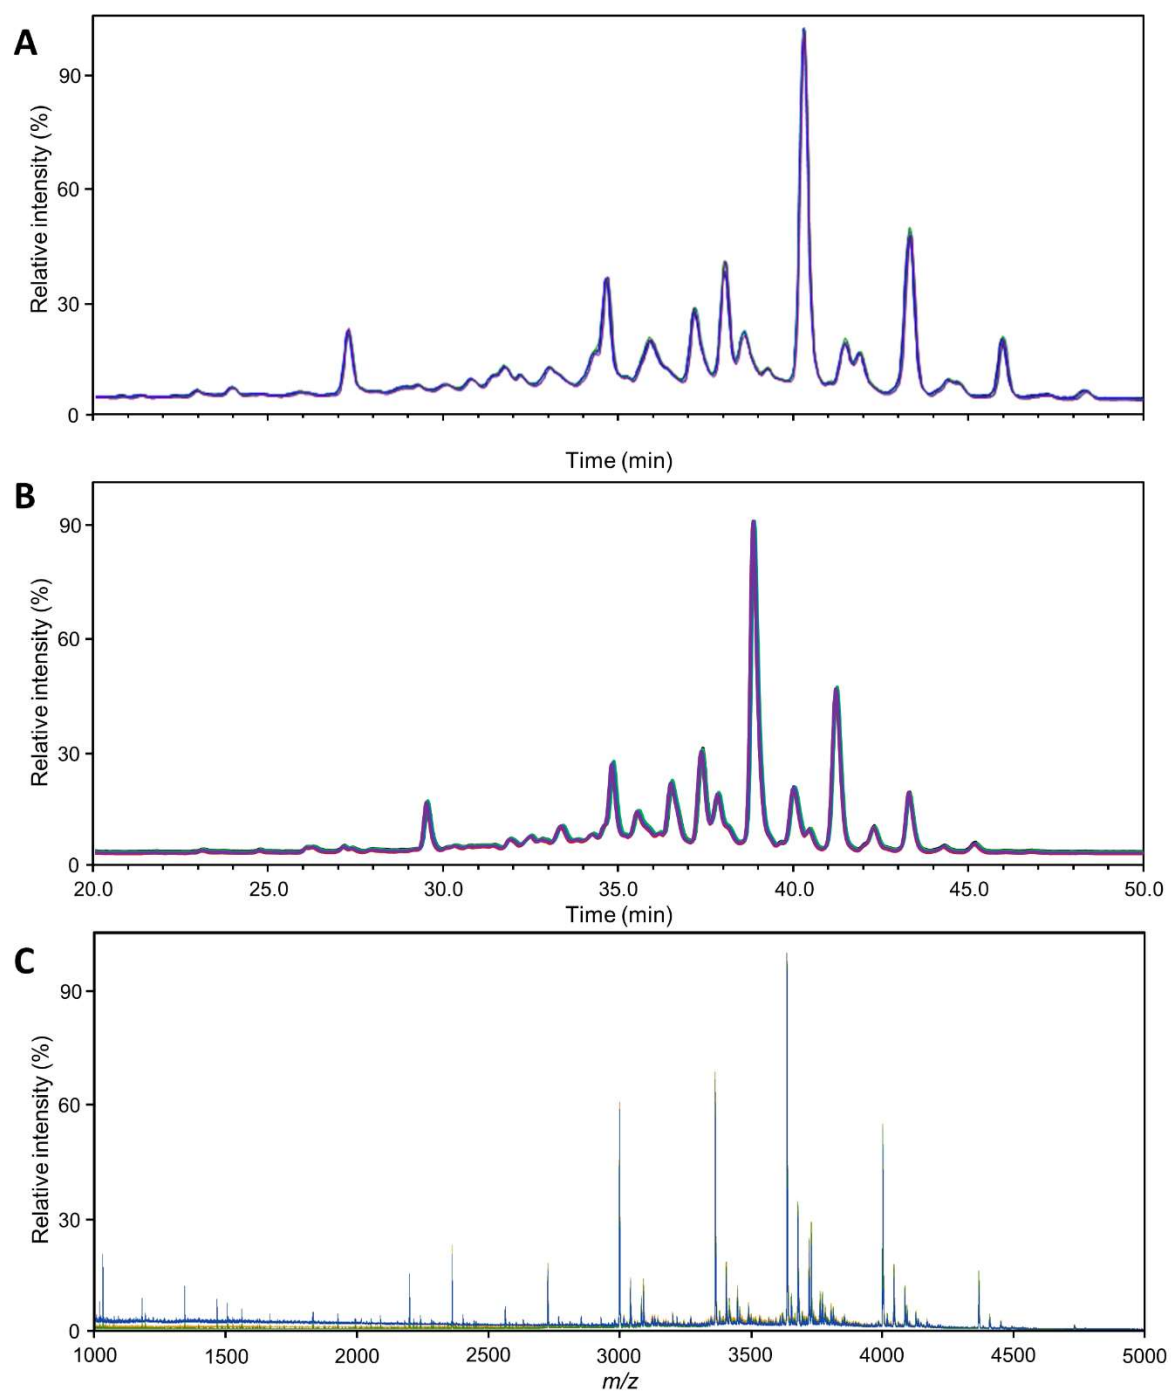

**Figure S1.** Profile comparability PharmEPO; Overlay of the 5 traces, normalized to the highest peak. A) HILIC-FLD(2AB); B) HILIC-FLD(PROC); C) MALDI-MS.

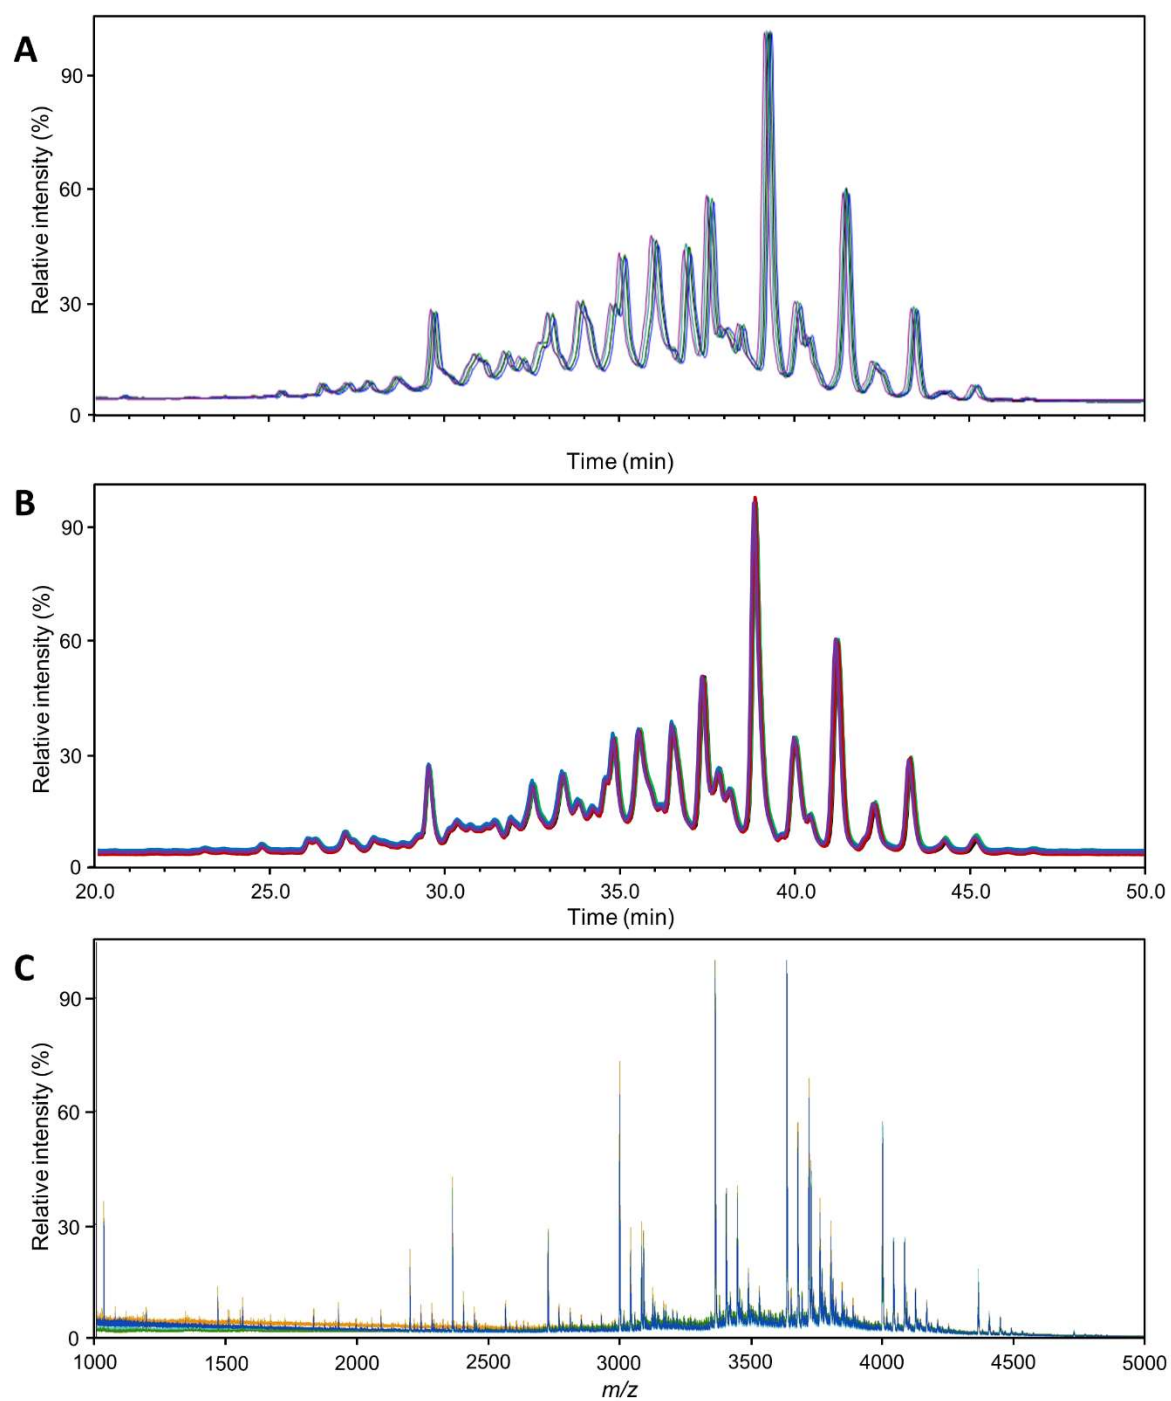

**Figure S2.** Profile comparability Eprex; Overlay of the 5 traces, normalized to the highest peak. A) HILIC-FLD(2AB); B) HILIC-FLD(PROC); C) MALDI-MS.

**Table S3.** Fingerprinting resolution: Number of significant\* t-tests.

|                 | Aranesp vs PharmEPO | Aranesp vs Eprex | PharmEPO vs Eprex |
|-----------------|---------------------|------------------|-------------------|
| HILIC-FLD(2AB)  | 24/25 (96%)         | 24/25 (96%)      | 19/25 (76%)       |
| HILIC-FLD(PROC) | 31/35 (89%)         | 33/35 (94%)      | 27/35 (77%)       |
| MALDI-MS        | 44/55 (80%)         | 41/55 (75%)      | 29/55 (53%)       |

\*  $\alpha$  after Bonferroni correction: HILIC-FLD(2AB)  $6.7 \cdot 10^{-4}$ , HILIC-FLD(PROC)  $4.8 \cdot 10^{-4}$ , MALDI-MS  $3.0 \cdot 10^{-4}$ .

**Table S4.** Epnex relative glycan abundances by composition. KEY  $\alpha$ : The number of acetyl (Ac) groups are not specified; the total % contribution is denoted in the structures containing AcX and the number of peaks are highlighted with parenthesis.

| Compositions       | Structures                             | MALDI-MS         | HILIC-FLD(2AB)/WAX         | HILIC-FLD(PROC)-MS     |
|--------------------|----------------------------------------|------------------|----------------------------|------------------------|
| <b>H3N3</b>        | <b>A1</b>                              | <b>nd</b>        | <b>0.08</b>                | <b>nd</b>              |
| <b>H5N2</b>        | <b>Man5</b>                            | <b>nd</b>        | <b>0.26</b>                | <b>nd</b>              |
| <b>H5N2P1</b>      | <b>Man5P</b>                           | <b>nd</b>        | <b>nd</b>                  | <b>0.21</b>            |
| <b>H3N4</b>        | <b>A2</b>                              | <b>nd</b>        | <b>0.02</b>                | <b>nd</b>              |
| <b>H6N2</b>        | <b>Man6</b>                            | <b>nd</b>        | <b>0.07</b>                | <b>nd</b>              |
| <b>H5N3</b>        | <b>Man5A1</b>                          | <b>nd</b>        | <b>0.06</b>                | <b>nd</b>              |
| <b>H6N2P1</b>      | <b>Man6P</b>                           | <b>0.06±0.03</b> | <b>nd</b>                  | <b>&lt;0.05</b>        |
| <b>H3N5</b>        | <b>A3</b>                              | <b>nd</b>        | <b>0.06</b>                | <b>nd</b>              |
| <b>H3N6</b>        | <b>A4</b>                              |                  | <b>0.05</b>                | <b>nd</b>              |
| <b>H3N3F1S1</b>    | <b>FA1G0S1</b>                         | <b>0.15±0.04</b> | <b>nd</b>                  | <b>nd</b>              |
| <b>H7N2</b>        | <b>Man7</b>                            | <b>nd</b>        | <b>0.05</b>                | <b>nd</b>              |
| <b>H7N2P1</b>      | <b>Man7P</b>                           | <b>0.04±0.02</b> | <b>nd</b>                  | <b>nd</b>              |
| <b>H5N4</b>        | <b>A2G2</b>                            | <b>nd</b>        | <b>0.11</b>                | <b>nd</b>              |
| <b>H4N3F1S1</b>    | <b>FA1G1S1</b>                         | <b>0.04±0.01</b> | <b>0.02</b>                | <b>nd</b>              |
| <b>H8N2</b>        | <b>Man8</b>                            | <b>nd</b>        | <b>0.09</b>                | <b>nd</b>              |
| <b>H5N4F1</b>      | <b>FA2G2</b>                           | <b>nd</b>        | <b>0.20</b>                | <b>nd</b>              |
| <b>H5N5</b>        | <b>A3G2</b>                            | <b>nd</b>        | <b>0.04</b>                | <b>nd</b>              |
| <b>H9N2</b>        | <b>Man9</b>                            | <b>nd</b>        | <b>0.09</b>                | <b>nd</b>              |
| <b>H4N4F1S1</b>    | <b>FA2[6]G1S1</b><br><b>FA2[3]G1S1</b> | <b>0.20±0.04</b> | <b>0.02</b><br><b>0.03</b> | <b>nd</b><br><b>nd</b> |
| <b>H4N4S2</b>      | <b>A2G1S2</b>                          | <b>0.07±0.01</b> | <b>nd</b>                  | <b>nd</b>              |
| <b>H5N4F1S1</b>    | <b>total</b>                           | <b>0.18±0.03</b> | <b>0.50</b>                | <b>0.35</b>            |
| H5N4F1S1           | FA2G2S1                                | 0.18±0.03        | 0.45                       | 0.35                   |
| H5N4F1S1AcX        | FA2G2S1AcX                             | nd               | 0.05                       | nd                     |
| <b>H4N4F1S2</b>    | <b>total</b>                           | <b>1.22±0.29</b> | <b>nd</b>                  | <b>nd</b>              |
| H4N4F1S2           | FA2G1S2                                | 0.76±0.16        | nd                         | nd                     |
| H4N4F1S2AcX        | FA2G1S2AcX                             | 0.46±0.13        | nd                         | nd                     |
| H4N4F1S2Ac1        | FA2G1S2Ac1                             | 0.24±0.06        | nd                         | nd                     |
| H4N4F1S2Ac2        | FA2G1S2Ac2                             | 0.23±0.07        | nd                         | nd                     |
| <b>H5N4S2</b>      | <b>A2G2S2</b>                          | <b>0.10±0.02</b> | <b>nd</b>                  | <b>nd</b>              |
| <b>H5N5F1S1</b>    | <b>FA2G1L1S1</b>                       | <b>0.09±0.01</b> | <b>0.02</b>                | <b>nd</b>              |
| <b>H5N4F1S2</b>    | <b>total</b>                           | <b>2.60±0.38</b> | <b>2.74</b>                | <b>3.65</b>            |
| H5N4F1S2           | FA2G2S2                                | 1.90±0.25        | 2.05                       | 3.05                   |
| H5N4F1S2AcX        | FA2G2S2AcX                             | 0.71±0.14        | 0.69(2)                    | 0.60                   |
| H5N4F1S2Ac1        | FA2G2S2Ac1                             | 0.44±0.09        | $\alpha$                   | 0.34                   |
| H5N4F1S2Ac2        | FA2G2S2Ac2                             | 0.27±0.06        | $\alpha$                   | 0.26                   |
| <b>H5N4F1S1Gc1</b> | <b>total</b>                           | <b>0.15±0.03</b> | <b>*</b>                   | <b>*</b>               |
| H5N4F1S1Gc1        | FA2G2S2<br>(1xNeuAc+1xNeuGc)           | 0.08±0.02        | *                          | *                      |
| H5N4F1S1Gc1Ac1     | FA2G2S2Ac1                             | 0.08±0.01        | *                          | *                      |
| <b>H6N5F1S1</b>    | <b>total</b>                           | <b>0.12±0.01</b> | <b>0.20</b>                | <b>nd</b>              |
| H6N5F1S1           | FA3G3S1                                | 0.12±0.01        | 0.16(2)                    | nd                     |
| H6N5F1S1AcX        | FA3G3S1AcX                             | nd               | 0.04                       | nd                     |
| <b>H5N5F1S2</b>    | <b>total</b>                           | <b>0.60±0.08</b> | <b>nd</b>                  | <b>nd</b>              |
| H5N5F1S2           | FA3G2S2                                | 0.40±0.05        | nd                         | nd                     |
| H5N5F1S2AcX        | FA3G2S2AcX                             | 0.20±0.04        | nd                         | nd                     |

|                    |                                            |                    |                            |              |
|--------------------|--------------------------------------------|--------------------|----------------------------|--------------|
| H5N5F1S2Ac1        | FA3G2S2Ac1                                 | 0.12±0.02          | nd                         | nd           |
| H5N5F1S2Ac2        | FA3G2S2Ac2                                 | 0.09±0.02          | nd                         | nd           |
| <b>H5N5F1S1Gc1</b> | <b>FA3G2S2</b><br><b>(1xNeuAc+1xNeuGc)</b> | <b>0.09±0.01</b>   | *                          | *            |
| <b>H6N6F1S1</b>    | <b>FA4G3S1</b>                             | <b>nd</b>          | <b>0.02</b>                | <b>nd</b>    |
| <b>H6N5F1S2</b>    | <b>Total</b>                               | <b>2.39±0.14</b>   | <b>1.70</b>                | <b>1.16</b>  |
| H6N5F1S2           | FA2G2L1S2<br>FA3G3S2                       | 1.64±0.08          | 0.04<br>1.48               | 0.85         |
| H6N5F1S2AcX        | FA3G3S2AcX                                 | 0.71±0.08          | 0.18(1)                    | 0.31         |
| H6N5F1S2Ac1        |                                            | 0.39±0.04          | α                          | nd           |
| H6N5F1S2Ac2        | FA3G3S2Ac2                                 | 0.32±0.04          | α                          | 0.31         |
| <b>H7N6F1S1</b>    | <b>FA4G4S1</b>                             | <b>nd</b>          | <b>0.13</b>                | <b>nd</b>    |
| <b>H5N5F1S2Gc1</b> | <b>FA3G2S3</b><br><b>(2xNeuAc+1xNeuGc)</b> | <b>0.23±0.03</b>   | *                          | *            |
| <b>H6N6F1S2</b>    | <b>FA3G2L1S2</b>                           | <b>0.26±0.01</b>   | <b>0.04</b>                | <b>nd</b>    |
| <b>H6N5F1S3</b>    | <b>Total</b>                               | <b>9.32±0.90**</b> | <b>5.10**</b>              | <b>4.2**</b> |
| H6N5F1S3           | FA3G3S3                                    | 4.89±0.27          | 5.10(2)                    | 2.03         |
| H6N5F1S3AcX        | FA3G3S3AcX                                 | 4.43±0.64          | nd                         | 2.17         |
| H6N5F1S3Ac1        | FA3G3S3Ac1                                 | 1.68±0.19          | nd                         | 1.68         |
| H6N5F1S3Ac2        | FA3G3S3Ac2                                 | 1.72±0.26          | nd                         | 0.49         |
| H6N5F1S3Ac3        |                                            | 0.66±0.11          | nd                         | nd           |
| H6N5F1S3Ac4        |                                            | 0.36±0.08          | nd                         | nd           |
| <b>H6N5F1S2Gc1</b> | <b>Total</b>                               | <b>0.56±0.06</b>   | *                          | *            |
| H6N5F1S2Gc1        | FA3G3S3<br>(2xNeuAc+1xNeuGc)               | 0.27±0.04          | *                          | *            |
| H6N5F1S2Gc1Ac1     |                                            | 0.29±0.03          | *                          | *            |
| <b>H7N6F1S2</b>    | <b>Total</b>                               | <b>2.72±0.29</b>   | <b>2.15</b>                | <b>2.17</b>  |
| H7N6F1S2           | FA4G4S2<br>FA3G3L1S2<br>FA2G2L2S2          | 1.85±0.23          | 1.19<br>0.42<br>0.02       | nd           |
| H7N6F1S2AcX        | FA4G4S2AcX                                 | 0.87±0.07          | 0.52(1)                    | nd           |
| H7N6F1S2Ac1        |                                            | 0.51±0.03          | α                          | nd           |
| H7N6F1S2Ac2        |                                            | 0.36±0.03          | α                          | nd           |
| <b>H8N7F1S1</b>    | <b>FA3G3L2S1</b><br><b>FA4G4L1S1</b>       | <b>nd</b>          | <b>0.02</b><br><b>0.05</b> | <b>nd</b>    |
| <b>H6N6F1S3</b>    | <b>Total</b>                               | <b>0.60±0.03</b>   | <b>2.19</b>                | <b>nd</b>    |
| H6N6F1S3           | FA4G3S3                                    | 0.32±0.02          | 1.96                       | nd           |
| H6N6F1S3AcX        | FA4G3S3AcX                                 | 0.28±0.02          | 0.23(4)                    | nd           |
| H6N6F1S3Ac1        |                                            | 0.28±0.02          | α                          | nd           |
| <b>H6N6F1S2Gc1</b> | FA4G3S3<br>(2xNeuAc+1xNeuGc)               | <b>0.27±0.02</b>   | *                          | *            |
| <b>H7N6F1S3</b>    | <b>Total</b>                               | <b>17.10±0.61</b>  | <b>13.80</b>               | <b>18.66</b> |
| H7N6F1S3           | FA4G4S3                                    | 9.39±0.56          | 7.69                       | 9.14         |
| H7N6F1S3AcX        | FA4G4S3AcX<br>FA3G3L1S3AcX                 | 7.71±0.31          | 5.22(7)<br>0.89            | 9.52         |
| H7N6F1S3Ac1        | FA4G4S3Ac1                                 | 3.44±0.13          | α                          | 4.98         |
| H7N6F1S3Ac2        | FA4G4S3Ac2                                 | 3.42±0.17          | α                          | 2.37         |
| H7N6F1S3Ac3        | FA4G4S3Ac3                                 | nd                 | α                          | 1.42         |
| H7N6F1S3Ac4        | FA4G4S3Ac4                                 | 0.85±0.09          | α                          | 0.75         |
| <b>H7N6F1S2Gc1</b> | FA4G4S3<br>(2xNeuAc+1xNeuGc)               | <b>0.46±0.11</b>   | *                          | *            |
| <b>H8N7F1S2</b>    | <b>Total</b>                               | <b>nd</b>          | <b>1.32</b>                | <b>nd</b>    |
| H8N7F1S2           | FA4G4L1S2                                  | nd                 | 0.86                       | nd           |



|                    |                                |                   |              |              |
|--------------------|--------------------------------|-------------------|--------------|--------------|
|                    | FA3G3L2S2                      |                   | 0.22         |              |
| H8N7F1S2AcX        | FA4G4L1S2AcX                   | nd                | 0.22(1)      | nd           |
| <b>H9N8F1S1</b>    | <b>FA4G4L2S1</b>               | <b>nd</b>         | <b>0.02</b>  | <b>nd</b>    |
| <b>H7N7F1S3</b>    | <b>Total</b>                   | <b>nd</b>         | <b>2.35</b>  | <b>nd</b>    |
| <b>H7N7F1S3AcX</b> | FA4G3L1S3AcX                   | nd                | 2.35         | nd           |
| <b>H7N6F1S4</b>    | <b>Total</b>                   | <b>29.54±1.77</b> | <b>43.79</b> | <b>39.63</b> |
| H7N6F1S4           | FA4G4S4                        | 10.79±0.18        | 11.78        | 9.94         |
| H7N6F1S4AcX        | FA4G4S4AcX                     | 18.75±1.87        | 31.99(7)     | 29.69        |
| H7N6F1S4Ac1        | FA4G4S4Ac1                     | 5.63±0.23         | α            | 7.5 (3)      |
| H7N6F1S4Ac2        | FA4G4S4Ac2                     | 6.64±0.60         | α            | 9.09 (3)     |
| H7N6F1S4Ac3        | FA4G4S4Ac3                     | 3.17±0.44         | α            | 4.4          |
| H7N6F1S4Ac4        | FA4G4S4Ac4                     | 2.39±0.42         | α            | 4.31 (2)     |
| H7N6F1S4Ac5        | FA4G4S4Ac5                     | 0.92±0.20         | α            | 2.12         |
| H7N6F1S4Ac6        | FA4G4S4Ac6                     | nd                | α            | 1.08         |
| H7N6F1S4Ac7        | FA4G4S4Ac7                     | nd                | α            | 0.74         |
| H7N6F1S4Ac8        | FA4G4S4Ac8                     | nd                | α            | 0.45         |
| <b>H7N6F1S3Gc1</b> | <b>Total</b>                   | <b>1.63±0.16</b>  | <b>*</b>     | <b>*</b>     |
| H7N6F1S3Gc1        | FA4G4S4<br>(3xNeuAc+1xNeuGc)   | 0.75±0.12         | *            | *            |
| H7N6F1S3Gc1Ac1     |                                | 0.88±0.05         | *            | *            |
| <b>H8N7F1S3</b>    | <b>Total</b>                   | <b>7.75±0.80</b>  | <b>4.16</b>  | <b>7.00</b>  |
| H8N7F1S3           | FA3G3L2S3<br>FA4G4L1S3         | 4.44±0.60         | 0.84<br>3.32 | 7.00         |
| H8N7F1S3Ac1        |                                | 1.63±0.13         | nd           | nd           |
| H8N7F1S3Ac2        |                                | 1.16±0.07         | nd           | nd           |
| H8N7F1S3Ac3        |                                | 0.53±0.02         | nd           | nd           |
| <b>H9N8F1S2</b>    | <b>FA4G4L2S2</b>               | <b>nd</b>         | <b>0.24</b>  | <b>nd</b>    |
| <b>H8N8F1S3</b>    | <b>FA4G3L2S3</b>               | <b>nd</b>         | <b>0.38</b>  | <b>nd</b>    |
| <b>H8N7F1S4</b>    | <b>Total</b>                   | <b>15.23±1.08</b> | <b>9.59</b>  | <b>16.08</b> |
| H8N7F1S4           | FA4G4L1S4                      | 6.45±0.73         | 7.17         | 8.25         |
| H8N7F1S4AcX        | FA4G4L1S4AcX                   | 8.78±0.41         | 2.42(1)      | 7.83         |
| H8N7F1S4Ac1        | FA4G4L1S4Ac1                   | 3.07±0.25         | α            | 4.26         |
| H8N7F1S4Ac2        | FA4G4L1S4Ac2                   | 3.05±0.15         | α            | 3.57 (2)     |
| H8N7F1S4Ac3        |                                | 1.39±0.06         | α            | nd           |
| H8N7F1S4Ac4        |                                | 0.90±0.06         | α            | nd           |
| H8N7F1S4Ac5        |                                | 0.37±0.03         | α            | nd           |
| <b>H8N7F1S3Gc1</b> | <b>Total</b>                   | <b>0.83±0.15</b>  | <b>*</b>     | <b>*</b>     |
| H8N7F1S3Gc1        | FA4G4L1S4<br>(3xNeuAc+1xNeuGc) | 0.39±0.09         | *            | *            |
| H8N7F1S3Gc1Ac1     |                                | 0.44±0.05         | *            | *            |
| <b>H9N8F1S3</b>    | <b>Total</b>                   | <b>1.34±0.30</b>  | <b>1.40</b>  | <b>2.15</b>  |
| H9N8F1S3           | FA4G4L2S3                      | 0.97±0.24         | 1.40         | 2.15         |
| H9N8F1S3AcX        | FA4G4L2S3AcX                   | 0.37±0.06         | nd           | nd           |
| H9N8F1S3Ac1        |                                | 0.37±0.06         | nd           | nd           |
| <b>H10N9F1S2</b>   | <b>FA4G4L3S2</b>               | <b>nd</b>         | <b>0.04</b>  | <b>nd</b>    |
| <b>H9N8F1S4</b>    | <b>Total</b>                   | <b>3.78±0.68</b>  | <b>3.81</b>  | <b>3.15</b>  |
| H9N8F1S4           | FA4G4L2S4                      | 1.89±0.43         | 2.80         | 3.15         |
| H9N8F1S4AcX        | FA4G4L2S4AcX                   | 1.89±0.25         | 1.01(1)      | nd           |
| H9N8F1S4Ac1        | FA4G4L2S4Ac1                   | 0.78±0.14         | α            | nd           |
| H9N8F1S4Ac2        | FA4G4L2S4Ac2                   | 0.62±0.08         | α            | nd           |
| H9N8F1S4Ac3        | FA4G4L2S4Ac3                   | 0.26±0.02         | α            | nd           |
| H9N8F1S4Ac4        | FA4G4L2S4Ac4                   | 0.16±0.01         | α            | nd           |
| H9N8F1S4Ac5        | FA4G4L2S4Ac5                   | 0.07±<0.01        | α            | nd           |

|                     |                     |                  |             |             |
|---------------------|---------------------|------------------|-------------|-------------|
| <b>H10N9F1S3</b>    | <b>FA4G4L3S3</b>    | <b>nd</b>        | <b>0.21</b> | <b>0.52</b> |
| <b>H10N9F1S4</b>    | <b>Total</b>        | <b>0.28±0.06</b> | <b>1.47</b> | <b>0.52</b> |
| H10N9F1S4           | FA4G4L3S4           | 0.17±0.05        | 1.21        | 0.52        |
| H10N9F1S4AcX        | FA4G4L3S4AcX        | 0.11±0.02        | 0.27        | nd          |
| H10N9F1S4Ac1        | FA4G4L3S4Ac1        | 0.07±0.01        | α           | nd          |
| H10N9F1S4Ac2        | FA4G4L3S4Ac2        | 0.05±0.01        | α           | nd          |
| <b>H11N10S3AcX</b>  | <b>FA4G4L4S3AcX</b> | <b>nd</b>        | <b>0.07</b> | <b>nd</b>   |
| <b>unidentified</b> |                     |                  |             | 0.55        |

#HILIC–FLD(2AB)/WAX does not distinguish the number of O-acetylations present

\*This/these methods do not differentiate NeuAc and NeuGc

\*\*The abundance of H6N5F1S3/FA3G3S3 is far lower in the HILIC methods than in MALDI-MS. For the HILIC-FLD(2AB)/WAX this is easily explained by the lack of detection of the O-acetylated variants. However, for HILIC-FLD(PROC)-MS the abundance is lower in all related species.

nd: not detected .
